# Supplementary material
Source: ML conference proceedings conference paper supplement (https://openreview.net/forum?id=KtH8W3S_RE)
Supplement: supplementary_material [file attachment]

## Sheet: driver_gene_significant_hits
Genes	CHROM	OBS_MIS	OBS_NONS	EXP_MIS	EXP_NONS	R_OBS	MU	SIGMA	PVAL_MIS	PVAL_NONS	CANCER
BRAF	7	26	0	1.71294	0.151633	105	89.2039	11.0386	2.56349e-20	0.859455	Skin_Melanoma
CDKN2A.p14arf	9	4	4	0.386964	0.0110563	16	22.6896	5.77397	0.000915282	8.84381e-10	Skin_Melanoma
CDKN2A.p16INK4a	9	4	4	0.69661	0.0172584	23	33.3605	8.12233	0.00702066	5.07144e-09	Skin_Melanoma
NRAS	1	16	0	0.320479	0.0117887	25	7.36872	3.22108	8.19313e-17	0.988294	Skin_Melanoma
TP53	17	9	2	0.875033	0.0551669	13	9.94695	2.39203	1.57513e-06	0.00154522	Skin_Melanoma
ARID1A	1	3	8	1.23927	0.0509185	20	12.456	3.20124	0.135513	5.19358e-15	Esophageal_AdenoCa
CDKN2A.p14arf	9	4	3	0.175172	0.00905407	15	9.58045	3.65174	6.69377e-05	1.8107e-07	Esophageal_AdenoCa
CDKN2A.p16INK4a	9	5	3	0.224285	0.00623471	15	11.0282	3.26772	7.91568e-06	5.13498e-08	Esophageal_AdenoCa
KRAS	12	5	0	0.117956	0.00626457	13	11.397	2.93043	3.05583e-07	0.993756	Esophageal_AdenoCa
MAP2	2	23	0	6.20682	0.279618	136	85.7851	12.288	1.72015e-06	0.756677	Esophageal_AdenoCa
SMAD4	18	12	1	0.345321	0.0165489	29	11.5558	3.00002	1.25084e-13	0.0164037	Esophageal_AdenoCa
TP53	17	57	13	0.255041	0.0115179	77	2.73985	1.91216	1.84295e-53	7.94822e-29	Esophageal_AdenoCa
TP53	17	9	4	0.0759521	0.00396499	14	0.76976	0.336942	2.20483e-14	2.65809e-11	Stomach_AdenoCa
ARID2	12	5	13	3.1347	0.210282	100	65.7461	5.51585	0.209492	3.4788e-19	Liver_HCC
AXIN1	16	0	9	0.887593	0.0519709	32	23.5285	2.71317	0.41379	1.1477e-17	Liver_HCC
CAMK1	3	7	1	0.471993	0.0297484	15	11.8919	1.74704	9.96779e-07	0.029301	Liver_HCC
CTNNB1	3	75	0	1.71426	0.0988545	106	30.0137	4.83018	3.08732e-74	0.905989	Liver_HCC
NFE2L2	2	13	0	1.0594	0.0699054	45	17.333	3.32303	1.00587e-09	0.932566	Liver_HCC
RB1	13	1	5	1.41909	0.108119	61	78.9752	4.80174	0.585636	1.16547e-07	Liver_HCC
SETDB1	1	14	0	2.2966	0.141169	57	32.603	4.37494	4.35015e-07	0.868498	Liver_HCC
TP53	17	56	11	0.619576	0.0346662	79	7.09241	1.31115	6.17113e-73	1.12711e-23	Liver_HCC

## Sheet: driver_noncoding_regions_signif
CHROM	START	END	ELT	ELT_TYPE	OBS_MUT	EXP	R_OBS	MU	SIGMA	PVAL	CANCER
1	55181494	55181581	gc19_pc.5utr::gencode::TTC4::ENSG00000243725.2	5utr	6	0.111625	14	7.26854	2.00961	6.43909e-09	Skin_Melanoma
11	61560030	61560274	gc19_pc.5utr::gencode::TMEM258::ENSG00000134825.9	5utr	8	0.270652	10	7.46774	1.91967	2.46561e-09	Skin_Melanoma
12	7079943	7080086	gc19_pc.5utr::gencode::EMG1::ENSG00000126749.10	5utr	6	0.0986579	20	15.7097	2.99348	1.92768e-09	Skin_Melanoma
13	41837702	41837742	gc19_pc.5utr::gencode::MTRF1::ENSG00000120662.11	5utr	10	0.0640527	16	8.67317	2.73383	9.39308e-18	Skin_Melanoma
14	31091317	31091544	gc19_pc.5utr::gencode::SCFD1::ENSG00000092108.16	5utr	9	0.269898	13	7.17128	3.173	1.34358e-09	Skin_Melanoma
14	50087279	50087403	gc19_pc.5utr::gencode::RPL36AL::ENSG00000165502.6	5utr	7	0.117512	12	6.24434	2.22743	4.30721e-10	Skin_Melanoma
16	2510080	2510145	gc19_pc.5utr::gencode::C16orf59::ENSG00000162062.10	5utr	10	0.0595346	20	8.73427	2.93895	6.62352e-18	Skin_Melanoma
16	84220506	84220669	gc19_pc.5utr::gencode::TAF1C::ENSG00000103168.12	5utr	8	0.391769	42	16.7449	3.70859	2.91697e-08	Skin_Melanoma
17	30771278	30771536	gc19_pc.5utr::gencode::PSMD11::ENSG00000108671.5	5utr	7	0.325202	14	7.772	2.08334	1.86793e-07	Skin_Melanoma
17	61904468	61904566	gc19_pc.5utr::gencode::FTSJ3::ENSG00000108592.12	5utr	5	0.0867495	12	7.40862	2.21512	8.15673e-08	Skin_Melanoma
17	62207389	62208179	gc19_pc.5utr::gencode::ERN1::ENSG00000178607.11	5utr	13	0.917652	20	7.38589	2.49183	3.94582e-09	Skin_Melanoma
17	80408575	80408705	gc19_pc.5utr::gencode::C17orf62::ENSG00000178927.12	5utr	6	0.150766	18	8.55542	2.88288	5.49328e-08	Skin_Melanoma
19	10514155	10514271	gc19_pc.5utr::gencode::CDC37::ENSG00000105401.2	5utr	8	0.147725	25	9.62172	2.83177	3.41276e-11	Skin_Melanoma
2	8821983	8822295	gc19_pc.5utr::gencode::ID2::ENSG00000115738.5	5utr	9	0.408472	13	9.52577	2.82057	6.01505e-09	Skin_Melanoma
20	34129769	34129846	gc19_pc.5utr::gencode::ERGIC3::ENSG00000125991.14	5utr	8	0.183583	26	13.8932	5.01809	3.91601e-10	Skin_Melanoma
22	30988118	30988385	gc19_pc.5utr::gencode::PES1::ENSG00000100029.13	5utr	13	0.344812	32	10.3957	3.79141	8.00049e-14	Skin_Melanoma
3	23958351	23958586	gc19_pc.5utr::gencode::RPL15::ENSG00000174748.14	5utr	9	0.281329	13	6.84939	2.2354	3.8302e-10	Skin_Melanoma
4	109541721	109541756	gc19_pc.5utr::gencode::RPL34::ENSG00000109475.12	5utr	6	0.0326012	19	6.31015	1.7669	4.50985e-12	Skin_Melanoma
5	149829265	149829319	gc19_pc.5utr::gencode::RPS14::ENSG00000164587.7	5utr	7	0.0641923	14	7.43702	1.70799	2.24123e-12	Skin_Melanoma
6	31926856	31926969	gc19_pc.5utr::gencode::SKIV2L::ENSG00000204351.7	5utr	6	0.113874	17	9.37675	3.14369	1.06219e-08	Skin_Melanoma
6	33239786	33239896	gc19_pc.5utr::gencode::RPS18::ENSG00000231500.2	5utr	8	0.120587	14	9.26219	3.10686	1.12043e-11	Skin_Melanoma
7	27779713	27779888	gc19_pc.5utr::gencode::TAX1BP1::ENSG00000106052.9	5utr	13	0.291373	23	10.2765	2.03669	1.66531e-16	Skin_Melanoma
7	56174106	56174269	gc19_pc.5utr::gencode::CHCHD2::ENSG00000106153.12	5utr	10	0.346739	31	13.7739	5.00111	2.65312e-10	Skin_Melanoma
7	73153127	73153197	gc19_pc.5utr::gencode::ABHD11::ENSG00000106077.14	5utr	5	0.0955284	15	10.4487	3.4949	1.54161e-07	Skin_Melanoma
7	102105375	102105527	gc19_pc.5utr::gencode::LRWD1::ENSG00000161036.6	5utr	7	0.157958	16	8.67354	2.91987	2.66588e-09	Skin_Melanoma
8	146017750	146017972	gc19_pc.5utr::gencode::RPL8::ENSG00000161016.11	5utr	8	0.151354	16	6.79988	1.90318	3.5217e-11	Skin_Melanoma
11	76227370	76227886	gc19_pc.3utr::gencode::C11orf30::ENSG00000158636.12	3utr	9	0.306703	27	6.40831	2.26697	1.15503e-09	Skin_Melanoma
1	894620	894870	gc19_pc.promCore::gencode::NOC2L::ENSG00000188976.6	promCore	7	0.26363	12	10.5084	3.51287	8.01899e-08	Skin_Melanoma
1	6845183	6845590	gc19_pc.promCore::gencode::CAMTA1::ENSG00000171735.14	promCore	14	0.490175	18	8.44973	2.84995	2.30952e-13	Skin_Melanoma
1	31769598	31769862	gc19_pc.promCore::gencode::SNRNP40::ENSG00000060688.8	promCore	12	0.305736	21	9.22226	3.09406	1.6349e-13	Skin_Melanoma
1	31769641	31769922	gc19_pc.promCore::gencode::ZCCHC17::ENSG00000121766.10	promCore	12	0.365162	21	9.22226	3.09406	1.21701e-12	Skin_Melanoma
1	38325202	38325492	gc19_pc.promCore::gencode::MTF1::ENSG00000188786.9	promCore	13	0.35276	24	7.79759	1.77838	3.60575e-15	Skin_Melanoma
1	43312079	43312328	gc19_pc.promCore::gencode::ZNF691::ENSG00000164011.13	promCore	9	0.355232	15	9.48386	2.55897	1.33371e-09	Skin_Melanoma
1	43824425	43824677	gc19_pc.promCore::gencode::CDC20::ENSG00000117399.9	promCore	18	0.273185	22	8.1762	1.74137	1.90773e-24	Skin_Melanoma
1	55181294	55181581	gc19_pc.promCore::gencode::TTC4::ENSG00000243725.2	promCore	8	0.352643	14	7.26854	2.00961	2.22351e-08	Skin_Melanoma
1	100598370	100598711	gc19_pc.promCore::gencode::SASS6::ENSG00000156876.8	promCore	10	0.430479	12	7.70568	3.42449	6.9656e-09	Skin_Melanoma
1	100598505	100598724	gc19_pc.promCore::gencode::TRMT13::ENSG00000122435.5	promCore	10	0.270532	12	7.70568	3.42449	1.00225e-10	Skin_Melanoma
1	153963034	153963272	gc19_pc.promCore::gencode::RPS27::ENSG00000177954.7	promCore	15	0.237416	26	8.79228	4.01206	3.04116e-17	Skin_Melanoma
1	155904164	155904390	gc19_pc.promCore::gencode::KIAA0907::ENSG00000132680.6	promCore	10	0.317232	14	9.35922	4.09776	3.92994e-10	Skin_Melanoma
1	235491513	235491813	gc19_pc.promCore::gencode::GGPS1::ENSG00000152904.7	promCore	7	0.28319	14	7.37689	2.52761	1.3797e-07	Skin_Melanoma
10	105156165	105156423	gc19_pc.promCore::gencode::USMG5::ENSG00000173915.8	promCore	10	0.284856	16	7.52036	2.56917	2.95454e-11	Skin_Melanoma
10	105156204	105156487	gc19_pc.promCore::gencode::PDCD11::ENSG00000148843.9	promCore	10	0.301619	16	7.52036	2.56917	5.06976e-11	Skin_Melanoma
11	207321	207628	gc19_pc.promCore::gencode::BET1L::ENSG00000177951.13	promCore	9	0.307748	14	8.05516	2.30496	4.83696e-10	Skin_Melanoma
11	207321	207710	gc19_pc.promCore::gencode::RIC8A::ENSG00000177963.8	promCore	9	0.360886	14	8.05516	2.30496	1.87125e-09	Skin_Melanoma
11	47447830	47448193	gc19_pc.promCore::gencode::PSMC3::ENSG00000165916.4	promCore	15	0.467857	25	10.1355	2.69551	1.0662e-15	Skin_Melanoma
11	61560030	61560474	gc19_pc.promCore::gencode::TMEM258::ENSG00000134825.9	promCore	9	0.441041	10	7.46774	1.91967	7.08956e-09	Skin_Melanoma
11	61560030	61560500	gc19_pc.promCore::gencode::FEN1::ENSG00000168496.3	promCore	9	0.469748	10	7.46774	1.91967	1.2017e-08	Skin_Melanoma
11	61734929	61735332	gc19_pc.promCore::gencode::FTH1::ENSG00000167996.11	promCore	9	0.368456	14	6.73901	0.844229	4.06653e-10	Skin_Melanoma
11	72145518	72145892	gc19_pc.promCore::gencode::CLPB::ENSG00000162129.8	promCore	9	0.621233	26	14.5888	3.73889	1.19623e-07	Skin_Melanoma
11	96123007	96123237	gc19_pc.promCore::gencode::CCDC82::ENSG00000149231.7	promCore	7	0.271535	12	6.24281	1.77176	6.41216e-08	Skin_Melanoma
11	96123007	96123237	gc19_pc.promCore::gencode::JRKL::ENSG00000183340.5	promCore	7	0.271535	12	6.24281	1.77176	6.41216e-08	Skin_Melanoma
12	498699	498820	gc19_pc.promCore::gencode::KDM5A::ENSG00000073614.7	promCore	11	0.129103	12	5.75209	1.81924	2.18134e-16	Skin_Melanoma
12	6772267	6772514	gc19_pc.promCore::gencode::ING4::ENSG00000111653.15	promCore	12	0.313451	16	9.53555	3.68653	6.78909e-13	Skin_Melanoma
12	7079706	7080086	gc19_pc.promCore::gencode::PHB2::ENSG00000215021.4	promCore	8	0.336451	20	15.7097	2.99348	7.07456e-09	Skin_Melanoma
12	7079743	7080086	gc19_pc.promCore::gencode::EMG1::ENSG00000126749.10	promCore	8	0.306704	20	15.7097	2.99348	3.4888e-09	Skin_Melanoma
12	49961830	49962136	gc19_pc.promCore::gencode::MCRS1::ENSG00000187778.9	promCore	7	0.271913	20	7.94828	2.69623	1.02577e-07	Skin_Melanoma
12	54582734	54582978	gc19_pc.promCore::gencode::SMUG1::ENSG00000123415.10	promCore	14	0.451786	25	15.2899	3.63838	5.28956e-15	Skin_Melanoma
12	57914200	57914500	gc19_pc.promCore::gencode::DDIT3::ENSG00000175197.6	promCore	7	0.211649	19	6.21795	1.82176	1.30995e-08	Skin_Melanoma
12	57914292	57914526	gc19_pc.promCore::gencode::MBD6::ENSG00000166987.10	promCore	8	0.190377	19	6.21795	1.82176	2.40275e-10	Skin_Melanoma
12	100660854	100661057	gc19_pc.promCore::gencode::DEPDC4::ENSG00000166153.12	promCore	8	0.238276	14	6.65453	0.802356	3.01605e-10	Skin_Melanoma
12	100660854	100661174	gc19_pc.promCore::gencode::SCYL2::ENSG00000136021.13	promCore	8	0.354471	14	6.65453	0.802356	6.45282e-09	Skin_Melanoma
12	112847390	112847645	gc19_pc.promCore::gencode::RPL6::ENSG00000089009.11	promCore	7	0.302577	12	7.96899	2.17286	1.2028e-07	Skin_Melanoma
13	41837702	41837942	gc19_pc.promCore::gencode::MTRF1::ENSG00000120662.11	promCore	10	0.347086	16	8.67317	2.73383	1.24104e-10	Skin_Melanoma
14	31091117	31091544	gc19_pc.promCore::gencode::SCFD1::ENSG00000092108.16	promCore	9	0.405495	13	7.17128	3.173	3.82268e-08	Skin_Melanoma
14	50087279	50087603	gc19_pc.promCore::gencode::RPL36AL::ENSG00000165502.6	promCore	8	0.28207	12	6.24434	2.22743	9.73109e-09	Skin_Melanoma
14	50087288	50087688	gc19_pc.promCore::gencode::MGAT2::ENSG00000168282.4	promCore	8	0.342845	12	6.24434	2.22743	4.17542e-08	Skin_Melanoma
14	77923837	77924183	gc19_pc.promCore::gencode::VIPAS39::ENSG00000151445.11	promCore	9	0.394283	11	8.38508	2.21736	3.01741e-09	Skin_Melanoma
14	77924012	77924325	gc19_pc.promCore::gencode::AHSA1::ENSG00000100591.3	promCore	8	0.362903	11	8.38508	2.21736	2.44858e-08	Skin_Melanoma
15	90931249	90931573	gc19_pc.promCore::gencode::IQGAP1::ENSG00000140575.8	promCore	16	0.305387	19	6.81614	2.37183	1.75202e-18	Skin_Melanoma
16	1470724	1471001	gc19_pc.promCore::gencode::C16orf91::ENSG00000174109.3	promCore	14	0.360379	25	10.1047	4.25159	4.40663e-14	Skin_Melanoma
16	2509880	2510145	gc19_pc.promCore::gencode::C16orf59::ENSG00000162062.10	promCore	12	0.285164	25	17.0813	3.69797	5.68847e-15	Skin_Melanoma
16	11945369	11945642	gc19_pc.promCore::gencode::RSL1D1::ENSG00000171490.8	promCore	7	0.239517	11	6.86013	2.58825	6.2063e-08	Skin_Melanoma
16	12009898	12010139	gc19_pc.promCore::gencode::GSPT1::ENSG00000103342.8	promCore	10	0.348186	33	18.8016	5.25928	7.33633e-11	Skin_Melanoma
16	14726385	14726785	gc19_pc.promCore::gencode::PARN::ENSG00000140694.12	promCore	8	0.29923	14	6.92954	2.4024	1.35719e-08	Skin_Melanoma
16	14726471	14726875	gc19_pc.promCore::gencode::BFAR::ENSG00000103429.6	promCore	8	0.350256	14	6.92954	2.4024	4.39153e-08	Skin_Melanoma
16	15982442	15982682	gc19_pc.promCore::gencode::FOPNL::ENSG00000133393.8	promCore	8	0.380378	29	13.2587	4.88535	1.01941e-07	Skin_Melanoma
16	57769441	57769767	gc19_pc.promCore::gencode::KATNB1::ENSG00000140854.8	promCore	12	0.616184	26	18.38	4.41203	5.75816e-11	Skin_Melanoma
16	67260901	67261116	gc19_pc.promCore::gencode::LRRC29::ENSG00000125122.10	promCore	15	0.333347	22	11.9504	3.99258	7.51123e-17	Skin_Melanoma
16	67260901	67261121	gc19_pc.promCore::gencode::AC040160.1::ENSG00000237102.2	promCore	15	0.336183	22	11.9504	3.99258	8.47085e-17	Skin_Melanoma
16	67260901	67261121	gc19_pc.promCore::gencode::TMEM208::ENSG00000168701.14	promCore	15	0.336183	22	11.9504	3.99258	8.47085e-17	Skin_Melanoma
16	84220506	84220869	gc19_pc.promCore::gencode::TAF1C::ENSG00000103168.12	promCore	12	0.842292	42	16.7449	3.70859	1.25437e-09	Skin_Melanoma
17	7338561	7338972	gc19_pc.promCore::gencode::TMEM102::ENSG00000181284.2	promCore	11	0.590724	33	14.6592	4.18719	1.00171e-09	Skin_Melanoma
17	8059672	8059923	gc19_pc.promCore::gencode::PER1::ENSG00000179094.9	promCore	8	0.206901	26	8.35599	2.82088	7.47443e-10	Skin_Melanoma
17	42976904	42977197	gc19_pc.promCore::gencode::EFTUD2::ENSG00000108883.8	promCore	7	0.277364	19	7.35955	1.7985	5.44783e-08	Skin_Melanoma
17	42976904	42977197	gc19_pc.promCore::gencode::CCDC103::ENSG00000167131.12	promCore	7	0.277364	19	7.35955	1.7985	5.44783e-08	Skin_Melanoma
17	42976934	42977197	gc19_pc.promCore::gencode::FAM187A::ENSG00000214447.3	promCore	7	0.250433	19	7.35955	1.7985	2.75395e-08	Skin_Melanoma
17	43138479	43138630	gc19_pc.promCore::gencode::NMT1::ENSG00000136448.7	promCore	6	0.186093	16	8.94143	2.39875	1.20098e-07	Skin_Melanoma
17	61627621	61628038	gc19_pc.promCore::gencode::DCAF7::ENSG00000136485.10	promCore	10	0.874221	27	15.4978	3.3377	1.44336e-07	Skin_Melanoma
17	61904468	61904566	gc19_pc.promCore::gencode::FTSJ3::ENSG00000108592.12	promCore	5	0.0867495	12	7.40862	2.21512	8.15673e-08	Skin_Melanoma
17	61904468	61904566	gc19_pc.promCore::gencode::PSMC5::ENSG00000087191.8	promCore	5	0.0867495	12	7.40862	2.21512	8.15673e-08	Skin_Melanoma
17	62207389	62207685	gc19_pc.promCore::gencode::ERN1::ENSG00000178607.11	promCore	11	0.373353	20	7.38589	2.49183	2.4258e-11	Skin_Melanoma
17	79980737	79980994	gc19_pc.promCore::gencode::STRA13::ENSG00000169689.10	promCore	12	0.277787	21	9.88975	1.98262	3.06834e-15	Skin_Melanoma
17	80408575	80408905	gc19_pc.promCore::gencode::C17orf62::ENSG00000178927.12	promCore	10	0.348252	18	8.55542	2.88288	1.81307e-10	Skin_Melanoma
19	2096667	2096944	gc19_pc.promCore::gencode::IZUMO4::ENSG00000099840.9	promCore	7	0.288803	13	9.58726	2.82775	1.05497e-07	Skin_Melanoma
19	2944838	2945131	gc19_pc.promCore::gencode::ZNF77::ENSG00000175691.8	promCore	9	0.328104	19	7.43908	2.12847	8.34339e-10	Skin_Melanoma
19	4246875	4247143	gc19_pc.promCore::gencode::CCDC94::ENSG00000105248.11	promCore	13	0.505457	25	15.2921	5.35014	5.49812e-12	Skin_Melanoma
19	6737587	6737814	gc19_pc.promCore::gencode::GPR108::ENSG00000125734.9	promCore	9	0.263138	20	9.9441	1.8941	4.0066e-11	Skin_Melanoma
19	7459798	7460133	gc19_pc.promCore::gencode::ARHGEF18::ENSG00000104880.13	promCore	10	0.515655	35	18.0352	5.1	2.99737e-09	Skin_Melanoma
19	7694413	7694651	gc19_pc.promCore::gencode::XAB2::ENSG00000076924.7	promCore	9	0.277339	19	12.5875	4.20795	3.77648e-10	Skin_Melanoma
19	7694422	7694719	gc19_pc.promCore::gencode::PET100::ENSG00000229833.5	promCore	8	0.360043	19	12.5875	4.20795	4.71998e-08	Skin_Melanoma
19	10230535	10230778	gc19_pc.promCore::gencode::EIF3G::ENSG00000130811.6	promCore	8	0.255489	15	9.72341	4.17247	1.05189e-08	Skin_Melanoma
19	10514155	10514271	gc19_pc.promCore::gencode::CDC37::ENSG00000105401.2	promCore	8	0.147725	25	9.62172	2.83177	3.41276e-11	Skin_Melanoma
19	16295990	16296253	gc19_pc.promCore::gencode::FAM32A::ENSG00000105058.7	promCore	10	0.397448	19	12.1752	4.64435	1.25695e-09	Skin_Melanoma
19	17970484	17970765	gc19_pc.promCore::gencode::RPL18A::ENSG00000105640.8	promCore	17	0.428113	34	14.1367	4.72822	1.18019e-17	Skin_Melanoma
19	45394276	45394571	gc19_pc.promCore::gencode::TOMM40::ENSG00000130204.8	promCore	17	0.386349	31	12.7506	5.76272	1.88767e-16	Skin_Melanoma
19	46498424	46498662	gc19_pc.promCore::gencode::CCDC61::ENSG00000104983.4	promCore	12	0.440883	35	15.8698	5.49421	1.25602e-11	Skin_Melanoma
19	48248578	48248816	gc19_pc.promCore::gencode::GLTSCR2::ENSG00000105373.14	promCore	9	0.276496	17	11.202	4.43903	8.6515e-10	Skin_Melanoma
19	49990610	49990886	gc19_pc.promCore::gencode::RPL13A::ENSG00000142541.12	promCore	30	0.417854	39	12.2469	2.25271	6.2505e-40	Skin_Melanoma
19	55591652	55591861	gc19_pc.promCore::gencode::EPS8L1::ENSG00000131037.10	promCore	7	0.231223	17	10.5632	4.05679	5.22585e-08	Skin_Melanoma
19	58978222	58978550	gc19_pc.promCore::gencode::ZNF324::ENSG00000083812.7	promCore	14	0.37807	20	8.57272	2.81107	6.04393e-15	Skin_Melanoma
2	8821983	8822295	gc19_pc.promCore::gencode::ID2::ENSG00000115738.5	promCore	9	0.408472	13	9.52577	2.82057	6.01505e-09	Skin_Melanoma
2	32390732	32390969	gc19_pc.promCore::gencode::SLC30A6::ENSG00000152683.10	promCore	11	0.272583	20	6.32242	2.24606	1.31957e-12	Skin_Melanoma
2	65283305	65283658	gc19_pc.promCore::gencode::CEP68::ENSG00000011523.9	promCore	11	0.39294	12	7.58273	0.866371	1.13944e-12	Skin_Melanoma
2	68384775	68385066	gc19_pc.promCore::gencode::PNO1::ENSG00000115946.3	promCore	10	0.252311	14	7.85489	2.11733	2.90399e-12	Skin_Melanoma
2	70056573	70056973	gc19_pc.promCore::gencode::GMCL1::ENSG00000087338.4	promCore	12	0.431153	18	7.95652	1.69773	6.21909e-13	Skin_Melanoma
2	74681949	74682243	gc19_pc.promCore::gencode::INO80B::ENSG00000115274.10	promCore	9	0.351601	14	9.14164	3.77329	8.04485e-09	Skin_Melanoma
2	88990961	88991216	gc19_pc.promCore::gencode::RPIA::ENSG00000153574.8	promCore	8	0.306159	14	7.55234	3.24865	4.07123e-08	Skin_Melanoma
2	96971175	96971497	gc19_pc.promCore::gencode::SNRNP200::ENSG00000144028.10	promCore	9	0.410551	22	9.60915	1.81805	1.82182e-09	Skin_Melanoma
2	208576063	208576409	gc19_pc.promCore::gencode::CCNYL1::ENSG00000163249.5	promCore	9	0.633726	20	14.0918	3.43284	1.22315e-07	Skin_Melanoma
2	210867088	210867385	gc19_pc.promCore::gencode::RPE::ENSG00000197713.10	promCore	10	0.400045	21	9.23518	1.6984	7.10266e-11	Skin_Melanoma
2	234763146	234763412	gc19_pc.promCore::gencode::HJURP::ENSG00000123485.7	promCore	9	0.519852	23	13.8127	3.39256	2.44817e-08	Skin_Melanoma
2	241500500	241500726	gc19_pc.promCore::gencode::ANKMY1::ENSG00000144504.11	promCore	8	0.189206	14	6.54432	0.790684	5.01118e-11	Skin_Melanoma
20	524315	524665	gc19_pc.promCore::gencode::CSNK2A1::ENSG00000101266.12	promCore	10	0.721473	25	16.2804	4.16715	4.34833e-08	Skin_Melanoma
20	33464037	33464448	gc19_pc.promCore::gencode::ACSS2::ENSG00000131069.15	promCore	9	0.542873	19	9.95376	2.87177	5.77641e-08	Skin_Melanoma
20	34129569	34129846	gc19_pc.promCore::gencode::ERGIC3::ENSG00000125991.14	promCore	10	0.52668	26	13.8932	5.01809	1.1788e-08	Skin_Melanoma
20	49126690	49127064	gc19_pc.promCore::gencode::PTPN1::ENSG00000196396.5	promCore	8	0.404141	17	8.10587	1.70607	3.35005e-08	Skin_Melanoma
21	33765219	33765531	gc19_pc.promCore::gencode::URB1::ENSG00000142207.5	promCore	24	0.449164	39	9.47024	3.62366	2.96417e-24	Skin_Melanoma
21	33765238	33765531	gc19_pc.promCore::gencode::C21orf119::ENSG00000256073.2	promCore	24	0.415769	39	9.47024	3.62366	5.31745e-25	Skin_Melanoma
21	46707786	46708013	gc19_pc.promCore::gencode::POFUT2::ENSG00000186866.12	promCore	13	0.18203	19	8.16355	2.23278	2.67908e-18	Skin_Melanoma
22	41985809	41986094	gc19_pc.promCore::gencode::PMM1::ENSG00000100417.7	promCore	12	0.358859	17	9.89835	3.75961	2.65357e-12	Skin_Melanoma
22	43010863	43011168	gc19_pc.promCore::gencode::POLDIP3::ENSG00000100227.13	promCore	7	0.340196	16	8.91873	1.93791	1.74447e-07	Skin_Melanoma
22	44208047	44208385	gc19_pc.promCore::gencode::EFCAB6::ENSG00000186976.10	promCore	12	0.638666	34	12.0141	3.14318	1.29882e-10	Skin_Melanoma
22	50312084	50312306	gc19_pc.promCore::gencode::ALG12::ENSG00000182858.9	promCore	9	0.212533	13	7.4827	2.21221	2.26988e-11	Skin_Melanoma
22	50312084	50312386	gc19_pc.promCore::gencode::CRELD2::ENSG00000184164.10	promCore	9	0.281958	13	7.4827	2.21221	2.59099e-10	Skin_Melanoma
3	12882992	12883287	gc19_pc.promCore::gencode::RPL32::ENSG00000144713.8	promCore	11	0.393049	33	12.8215	4.78955	8.0987e-11	Skin_Melanoma
3	16306383	16306679	gc19_pc.promCore::gencode::DPH3::ENSG00000154813.5	promCore	17	0.312162	21	7.10421	0.856979	3.10469e-23	Skin_Melanoma
3	23958351	23958586	gc19_pc.promCore::gencode::RPL15::ENSG00000174748.14	promCore	9	0.281329	13	6.84939	2.2354	3.8302e-10	Skin_Melanoma
3	23958351	23958586	gc19_pc.promCore::gencode::NKIRAS1::ENSG00000197885.6	promCore	9	0.281329	13	6.84939	2.2354	3.8302e-10	Skin_Melanoma
3	101280505	101280847	gc19_pc.promCore::gencode::TRMT10C::ENSG00000174173.6	promCore	12	0.346944	19	7.49087	0.852479	9.92297e-15	Skin_Melanoma
3	122134682	122135082	gc19_pc.promCore::gencode::WDR5B::ENSG00000196981.2	promCore	8	0.370677	9	6.63911	0.876306	9.71513e-09	Skin_Melanoma
4	2936495	2936786	gc19_pc.promCore::gencode::MFSD10::ENSG00000109736.10	promCore	11	0.289411	14	9.05105	3.03934	1.68785e-12	Skin_Melanoma
4	106629794	106630040	gc19_pc.promCore::gencode::INTS12::ENSG00000138785.10	promCore	8	0.39169	25	17.8868	3.70816	2.57627e-08	Skin_Melanoma
4	109541521	109541756	gc19_pc.promCore::gencode::RPL34::ENSG00000109475.12	promCore	11	0.176861	19	6.31015	1.7669	3.12417e-15	Skin_Melanoma
4	152020524	152020804	gc19_pc.promCore::gencode::RPS3A::ENSG00000145425.5	promCore	10	0.243211	13	7.24506	2.49001	6.8148e-12	Skin_Melanoma
5	1295104	1295362	gc19_pc.promCore::gencode::TERT::ENSG00000164362.14	promCore	23	0.906872	46	24.4234	7.94255	3.15286e-18	Skin_Melanoma
5	60627899	60628099	gc19_pc.promCore::gencode::ZSWIM6::ENSG00000130449.5	promCore	7	0.224731	27	9.83623	3.61602	3.73471e-08	Skin_Melanoma
5	149829265	149829519	gc19_pc.promCore::gencode::RPS14::ENSG00000164587.7	promCore	7	0.291572	14	7.43702	1.70799	6.82963e-08	Skin_Melanoma
6	26043885	26044085	gc19_pc.promCore::gencode::HIST1H2BB::ENSG00000196226.2	promCore	9	0.156306	20	8.73667	2.23753	9.21132e-13	Skin_Melanoma
6	30585000	30585221	gc19_pc.promCore::gencode::PPP1R10::ENSG00000204569.5	promCore	7	0.20054	22	7.15879	2.46566	1.42233e-08	Skin_Melanoma
6	31926668	31926969	gc19_pc.promCore::gencode::NELFE::ENSG00000204356.7	promCore	9	0.325612	17	9.37675	3.14369	1.49074e-09	Skin_Melanoma
6	31926668	31926969	gc19_pc.promCore::gencode::SKIV2L::ENSG00000204351.7	promCore	9	0.325612	17	9.37675	3.14369	1.49074e-09	Skin_Melanoma
6	33239681	33239896	gc19_pc.promCore::gencode::VPS52::ENSG00000223501.4	promCore	11	0.218722	14	9.26219	3.10686	8.86244e-14	Skin_Melanoma
6	33239681	33239896	gc19_pc.promCore::gencode::RPS18::ENSG00000231500.2	promCore	11	0.218722	14	9.26219	3.10686	8.86244e-14	Skin_Melanoma
6	110501143	110501383	gc19_pc.promCore::gencode::CDC40::ENSG00000168438.10	promCore	7	0.251088	12	6.75495	1.75911	3.16612e-08	Skin_Melanoma
7	27779513	27779888	gc19_pc.promCore::gencode::TAX1BP1::ENSG00000106052.9	promCore	13	0.60309	23	10.2765	2.03669	1.38798e-12	Skin_Melanoma
7	39605774	39606017	gc19_pc.promCore::gencode::YAE1D1::ENSG00000241127.3	promCore	8	0.390272	21	8.94953	1.76693	2.30797e-08	Skin_Melanoma
7	56174106	56174469	gc19_pc.promCore::gencode::CHCHD2::ENSG00000106153.12	promCore	11	0.780443	31	13.7739	5.00111	5.6264e-08	Skin_Melanoma
7	66461601	66461965	gc19_pc.promCore::gencode::TYW1::ENSG00000198874.8	promCore	19	0.510814	20	8.84771	3.6231	3.02819e-17	Skin_Melanoma
7	72298654	72298953	gc19_pc.promCore::gencode::TYW1B::ENSG00000254184.3	promCore	12	0.408606	28	8.43413	3.22171	1.17264e-11	Skin_Melanoma
7	73153127	73153397	gc19_pc.promCore::gencode::ABHD11::ENSG00000106077.14	promCore	10	0.372872	15	10.4487	3.4949	3.29633e-10	Skin_Melanoma
7	102105283	102105523	gc19_pc.promCore::gencode::ALKBH4::ENSG00000160993.3	promCore	8	0.235795	16	8.67354	2.91987	2.0063e-09	Skin_Melanoma
7	102105283	102105527	gc19_pc.promCore::gencode::LRWD1::ENSG00000161036.6	promCore	8	0.246002	16	8.67354	2.91987	2.76907e-09	Skin_Melanoma
7	132937628	132937857	gc19_pc.promCore::gencode::EXOC4::ENSG00000131558.10	promCore	9	0.52341	23	14.3507	4.80153	7.53487e-08	Skin_Melanoma
7	150725309	150725553	gc19_pc.promCore::gencode::ABCB8::ENSG00000197150.8	promCore	8	0.44954	25	14.2101	3.99475	1.41837e-07	Skin_Melanoma
8	56986942	56987269	gc19_pc.promCore::gencode::RPS20::ENSG00000008988.5	promCore	21	0.476504	34	9.40743	2.8071	2.40966e-22	Skin_Melanoma
8	117768056	117768184	gc19_pc.promCore::gencode::EIF3H::ENSG00000147677.6	promCore	7	0.20445	15	9.16432	1.55438	4.22804e-09	Skin_Melanoma
8	144691754	144691984	gc19_pc.promCore::gencode::PYCRL::ENSG00000104524.9	promCore	7	0.266111	14	10.6238	2.95695	5.36809e-08	Skin_Melanoma
8	146017750	146018172	gc19_pc.promCore::gencode::RPL8::ENSG00000161016.11	promCore	8	0.322669	16	6.79988	1.90318	1.17895e-08	Skin_Melanoma
9	33473840	33474128	gc19_pc.promCore::gencode::NOL6::ENSG00000165271.12	promCore	8	0.345137	15	9.39878	3.55576	5.54833e-08	Skin_Melanoma
9	35658100	35658376	gc19_pc.promCore::gencode::CCDC107::ENSG00000159884.7	promCore	8	0.295742	25	10.5346	2.94536	6.07992e-09	Skin_Melanoma
9	135905875	135906285	gc19_pc.promCore::gencode::GTF3C5::ENSG00000148308.13	promCore	14	0.572404	22	10.106	2.89069	4.238e-13	Skin_Melanoma
9	139258166	139258441	gc19_pc.promCore::gencode::DNLZ::ENSG00000213221.4	promCore	7	0.341248	13	11.2418	2.20273	1.54939e-07	Skin_Melanoma
20	32580865	32580956	lncrna.ncrna::gencode::RP5-1125A11.1::ENSG00000228265.1	lncrna_nc	14	0.0988781	36	7.72935	2.63069	1.17039e-22	Skin_Melanoma
20	32580865	32580956	lncrna.promCore::gencode::RP5-1125A11.1::ENSG00000228265.1	df_lncrna_promCore	14	0.0988781	36	7.72935	2.63069	1.17039e-22	Skin_Melanoma
20	32580976	32581130	lncrna.promCore::gencode::RP5-1125A11.1::ENSG00000228265.1	df_lncrna_promCore	9	0.176223	36	7.72935	2.63069	8.29719e-12	Skin_Melanoma
8	30601481	30601794	lncrna.promCore::gencode::UBXN8::ENSG00000104691.10	df_lncrna_promCore	10	0.286738	12	7.23995	2.53303	3.60096e-11	Skin_Melanoma
19	893483	893590	smallrna.ncrna::gencode::RNU6-9::ENSG00000207507.1	df_smallrna_nc	5	0.095774	16	9.85523	3.37232	1.61997e-07	Skin_Melanoma
4	41387414	41387774	enhancers::chr4:41383200-41389200::NA::NA	enhancer	8	0.179361	27	5.17891	2.61663	1.79757e-09	Esophageal_AdenoCa
7	86866240	86866400	enhancers::chr7:86865600-86866400::NA::NA	enhancer	9	0.0616723	11	4.43335	1.22391	3.20043e-16	Esophageal_AdenoCa
10	28908535	28912041	gc19_pc.3utr::gencode::WAC::ENSG00000095787.17	3utr	24	1.15616	30	6.53184	2.23166	1.49055e-16	Esophageal_AdenoCa
6	7609106	7612200	gc19_pc.3utr::gencode::SNRNP48::ENSG00000168566.11	3utr	17	0.760275	25	5.32042	1.52543	1.59152e-14	Esophageal_AdenoCa
1	243419119	243419475	gc19_pc.promCore::gencode::SDCCAG8::ENSG00000054282.11	promCore	7	0.186218	11	4.60154	2.47596	5.245e-08	Esophageal_AdenoCa
8	97273728	97274038	gc19_pc.promCore::gencode::MTERFD1::ENSG00000156469.4	promCore	6	0.134662	10	3.0771	1.07487	3.10381e-08	Esophageal_AdenoCa
17	5335316	5335782	enhancers::chr17:5334200-5337000::NA::NA	enhancer	10	0.370577	14	8.06277	1.68894	4.77299e-11	Liver_HCC
1	173097084	173097644	enhancers::chr1:173097000-173098400::NA::NA	enhancer	8	0.463038	13	8.30447	1.90744	1.09485e-07	Liver_HCC
11	62609040	62609281	gc19_pc.5utr::gencode::WDR74::ENSG00000133316.11	5utr	9	0.127242	22	5.03768	0.368315	2.58331e-14	Liver_HCC
12	121842651	121842916	gc19_pc.5utr::gencode::RNF34::ENSG00000170633.12	5utr	7	0.16809	9	6.51284	1.36843	1.45201e-09	Liver_HCC
3	101947984	101948185	gc19_pc.5utr::gencode::ZPLD1::ENSG00000170044.4	5utr	7	0.203019	11	9.73392	2.56325	7.77964e-09	Liver_HCC
1	79085887	79086121	gc19_pc.promCore::gencode::IFI44L::ENSG00000137959.11	promCore	17	0.197139	30	9.12642	2.33773	1.71501e-24	Liver_HCC
11	62609081	62609481	gc19_pc.promCore::gencode::WDR74::ENSG00000133316.11	promCore	12	0.211686	22	5.03768	0.368315	1.94061e-17	Liver_HCC
19	56708962	56709096	gc19_pc.promCore::gencode::ZSCAN5B::ENSG00000197213.5	promCore	5	0.0966074	15	6.80501	1.4825	9.89872e-08	Liver_HCC
5	1295104	1295362	gc19_pc.promCore::gencode::TERT::ENSG00000164362.14	promCore	10	0.225529	14	7.20557	2.335	2.38775e-12	Liver_HCC
11	65191097	65212849	lncrna.ncrna::gencode::NEAT1::ENSG00000245532.4	lncrna_nc	69	14.7279	73	20.8511	3.14714	3.56123e-16	Liver_HCC
1	3501679	3502288	lncrna.ncrna::mitranscriptome::G000211::G000211	lncrna_nc	7	0.353379	11	6.13045	0.925067	1.50897e-07	Liver_HCC
9	35657814	35658100	lncrna.promCore::gencode::RMRP::ENSG00000269900.2	df_lncrna_promCore	8	0.180726	17	5.4396	1.09319	6.40712e-11	Liver_HCC

## Sheet: driver_hotspots_significant_hit
CHROM	START	END	Pi	MU	SIGMA	OBS	EXP	PVAL
20	32580900	32580950	0.00838481	7.08304	2.30228	14	0.0593899	6.38033e-26
20	32581000	32581050	0.00706401	7.08304	2.30228	9	0.0500346	9.97851e-17
19	45394350	45394400	0.00424652	11.2605	4.7902	10	0.0478177	3.78069e-18
11	47448100	47448150	0.00475942	10.2586	4.15339	14	0.048825	5.02726e-26
2	8822000	8822050	0.00694431	7.93397	2.49749	9	0.055096	2.02779e-16
4	18983600	18983650	0.00396176	71.361	12.3595	9	0.282715	6.25661e-11
7	27779700	27779750	0.00679076	9.76808	3.80362	13	0.0663327	1.54955e-22
17	7338550	7338600	0.0053977	15.9079	6.23188	11	0.085866	1.27786e-17
21	33765350	33765400	0.0093988	9.21669	3.61205	17	0.0866258	5.08157e-28
7	39605950	39606000	0.0103674	8.36531	3.4535	8	0.0867263	2.17088e-12
13	41837700	41837750	0.0076936	9.12967	3.51476	10	0.07024	8.05747e-17
13	50857950	50858000	0.00402655	20.3536	7.16414	7	0.0819549	3.50292e-11
8	146017800	146017850	0.00596145	7.52894	2.5055	8	0.0448834	4.53755e-15
17	28705850	28705900	0.00654607	8.54611	3.61661	6	0.0559434	3.08866e-10
17	45000450	45000500	0.0108223	5.96485	2.59217	6	0.0645532	7.82763e-10
20	49126800	49126850	0.0110293	8.50288	3.7224	7	0.0937809	2.02056e-10
12	109490300	109490350	0.00810561	7.32482	2.37303	6	0.0593722	2.13166e-10
2	65283450	65283500	0.00816604	6.69279	2.37389	6	0.0546536	1.62098e-10
16	54963100	54963150	0.00772571	6.53824	3.13555	7	0.0505125	4.42562e-12
18	30412600	30412650	0.00339107	23.8515	5.16478	6	0.0808819	6.81472e-10
8	135844650	135844700	0.00814724	8.09698	1.98472	6	0.065968	2.39645e-10
6	73464100	73464150	0.00349157	23.2509	4.98016	8	0.0811823	1.35023e-13
17	42977000	42977050	0.00908572	7.78323	0.770629	7	0.0707162	2.00853e-12
22	30988150	30988200	0.00602699	10.7115	2.62493	13	0.0645579	2.22421e-24
17	72869500	72869550	0.00623232	13.1903	3.20348	7	0.0822064	1.37337e-11
16	2510050	2510100	0.00707965	8.32154	0.649371	12	0.0589136	5.09235e-24
10	7830000	7830050	0.00955568	6.53307	0.447172	6	0.062428	8.33772e-11
15	100273800	100273850	0.00729366	11.2586	2.76167	6	0.0821162	8.7584e-10
3	40494850	40494900	0.0083856	8.86346	2.17087	7	0.0743254	6.96295e-12
11	82868050	82868100	0.00876756	9.82235	2.39926	7	0.086118	1.91359e-11
16	67260950	67261000	0.00654073	11.0338	2.70571	14	0.0721695	8.58476e-26
2	96971300	96971350	0.00822563	9.94615	2.43109	6	0.0818133	8.52617e-10
5	64920800	64920850	0.00871003	7.46536	1.70655	6	0.0650236	2.00078e-10
5	1295200	1295250	0.00882697	25.743	5.76864	18	0.227233	1.19517e-25
4	109541650	109541700	0.00559022	6.4908	1.16563	5	0.036285	6.8852e-10
4	109541700	109541750	0.00650315	6.4908	1.16563	6	0.0422107	1.18873e-11
19	41769750	41769800	0.00644574	12.4528	4.79042	9	0.0802674	1.61019e-14
6	33239800	33239850	0.00659492	9.34701	3.37814	8	0.0616428	7.88816e-14
2	116252950	116253000	0.00421248	46.3802	11.6786	9	0.195376	6.14623e-12
7	35328250	35328300	0.00522077	62.5001	12.0313	9	0.326299	2.63365e-10
11	61735150	61735200	0.0069459	5.96149	1.52526	8	0.0414079	9.93874e-16
12	6772350	6772400	0.00726533	8.48848	2.01635	9	0.0616716	1.9154e-16
7	100026800	100026850	0.00581686	6.53231	2.09663	6	0.0379976	1.47775e-11
7	100026850	100026900	0.00557472	6.53231	2.09663	6	0.0364158	1.14751e-11
1	55181500	55181550	0.00915743	6.88981	1.8336	6	0.0630929	2.0898e-10
11	111797650	111797700	0.0070885	7.36543	2.33187	6	0.0522099	9.46284e-11
3	122135000	122135050	0.00617349	6.65121	1.00874	6	0.0410612	8.90859e-12
11	207450	207500	0.00659779	6.87904	1.31224	6	0.0453865	1.93284e-11
3	58286000	58286050	0.00400267	12.5586	4.80539	6	0.0502681	1.21111e-10
19	10514200	10514250	0.00623957	8.00277	1.77119	6	0.0499338	4.00672e-11
21	46707850	46707900	0.00499765	7.88035	2.46023	9	0.0393833	9.77061e-18
19	17970650	17970700	0.00466889	12.9237	4.82005	11	0.0603392	1.88718e-19
5	149829250	149829300	0.00737297	8.2947	2.67939	6	0.0611565	2.52331e-10
4	152020700	152020750	0.00431013	6.85313	1.22791	9	0.0295379	1.31998e-19
17	1588250	1588300	0.00619937	7.56495	1.90058	6	0.046898	3.28094e-11
4	162481750	162481800	0.00365607	41.6567	11.1186	8	0.1523	3.21867e-11
17	79980900	79980950	0.00546761	9.12678	2.8205	7	0.0499017	7.66539e-13
19	1653000	1653050	0.00529693	13.9446	5.23904	13	0.0738634	4.219e-22
22	44208250	44208300	0.0087178	12.3284	5.63611	10	0.107477	1.88195e-14
3	23958550	23958600	0.00709984	7.56273	3.17081	9	0.0536942	7.73393e-16
1	115256500	115256550	0.00477441	7.36226	3.28141	14	0.0351505	1.85868e-27
2	68384900	68384950	0.00749377	7.21956	3.25601	7	0.0541017	5.31737e-12
9	139258250	139258300	0.00536619	10.4464	4.80224	7	0.0560575	7.41283e-12
1	179846950	179847000	0.00881045	7.22228	3.21192	7	0.0636315	1.52386e-11
12	100660900	100660950	0.00775903	7.44646	2.77709	7	0.0577773	3.8569e-12
4	2936600	2936650	0.00488083	8.31363	3.3476	10	0.0405774	4.92078e-19
7	102105350	102105400	0.00702083	9.25732	3.96651	8	0.0649941	2.74716e-13
18	59671900	59671950	0.00356962	34.6831	9.85904	7	0.123805	3.21577e-10
12	54582850	54582900	0.00601403	13.1122	5.53721	10	0.0788571	4.91793e-16
12	498750	498800	0.00908887	6.50975	3.07864	11	0.0591663	1.25535e-18
19	42773000	42773050	0.00604482	10.0452	4.60821	9	0.0607216	4.20926e-15
3	16306500	16306550	0.00503334	6.49845	2.80092	17	0.0327089	1.98556e-34
17	38574300	38574350	0.00528644	11.8373	5.44255	6	0.0625772	7.90285e-10
8	56987100	56987150	0.00818007	9.58569	4.48113	20	0.0784116	1.63211e-32
11	64018900	64018950	0.00725903	8.78661	3.58262	6	0.0637822	5.95751e-10
2	241500500	241500550	0.00811618	5.80527	3.02657	8	0.0471167	7.07355e-14
10	105156300	105156350	0.00904467	7.20375	2.84452	6	0.0651555	6.1372e-10
16	14726600	14726650	0.00642024	7.55334	3.15495	6	0.0484942	1.27334e-10
1	43824500	43824550	0.00844604	8.22614	3.12252	17	0.0694783	7.60171e-30
3	101280650	101280700	0.00742452	7.3162	3.00868	12	0.0543193	1.73655e-21
12	49961900	49961950	0.00639222	7.76137	3.93104	6	0.0496124	2.89487e-10
12	7080000	7080050	0.00413435	6.94002	3.3004	5	0.0286925	8.76887e-10
1	100598550	100598600	0.00839847	7.41884	3.01369	10	0.0623069	3.63246e-17
17	30771450	30771500	0.0083311	7.04989	3.3121	7	0.0587333	1.13115e-11
2	143791650	143791700	0.0025965	21.2909	6.85039	6	0.0552819	1.3757e-10
7	140453100	140453150	0.008888	7.86572	3.37161	20	0.0699105	2.42542e-34
2	26101450	26101500	0.00913374	11.6258	5.25685	7	0.106187	5.41436e-10
19	49990650	49990700	0.00686473	12.9686	5.4799	24	0.089026	2.59596e-39
5	137800750	137800800	0.00630658	11.8101	5.30014	7	0.0744812	4.67124e-11
2	70056750	70056800	0.00822453	7.11751	3.22637	11	0.0585382	7.40918e-19
8	58118600	58118650	0.00711771	47.6024	11.7549	11	0.33882	1.67409e-12
7	1544050	1544100	0.0058417	11.214	5.16057	10	0.0655088	1.57914e-16
15	90931350	90931400	0.0059872	6.89976	2.66533	14	0.0413102	2.78223e-27
2	32390900	32390950	0.0106116	6.59416	2.7181	7	0.0699744	2.11787e-11
4	28871400	28871450	0.00478607	52.7404	12.4571	10	0.252419	1.75391e-12
11	37585100	37585150	0.00194144	66.6796	13.8605	9	0.129454	9.65062e-14
4	79992900	79992950	0.00231921	31.8783	7.86434	6	0.0739323	4.74889e-10
20	23976950	23977000	0.00172697	24.3789	6.3779	7	0.0421016	1.55564e-13
2	4703950	4704000	0.00178959	72.6212	13.4995	7	0.129962	2.12337e-10
6	62008050	62008100	0.00231329	66.767	13.8557	8	0.154451	1.99501e-11
6	38461900	38461950	0.00192477	10.918	4.73104	6	0.0210146	9.98412e-13
5	4279700	4279750	0.00194381	67.7164	13.8039	8	0.131628	5.51414e-12
18	48591900	48591950	0.00226544	7.33661	1.61802	6	0.0166206	5.627e-14
2	211728350	211728400	0.00177767	52.3301	13.4264	7	0.0930256	3.59475e-11
2	218654050	218654100	0.00259466	12.1499	5.22367	9	0.0315248	7.95859e-18
19	32291550	32291600	0.0019275	54.83	13.601	7	0.105685	8.06992e-11
14	97988650	97988700	0.00208093	52.1711	13.4134	7	0.108564	1.04367e-10
11	42738700	42738750	0.00191678	78.8131	13.1711	9	0.151067	2.42533e-13
6	50570100	50570150	0.00170854	33.3835	8.32939	13	0.057037	5.04358e-25
18	40431050	40431100	0.00216938	33.8522	8.47853	6	0.0734383	4.66721e-10
1	196865800	196865850	0.00231468	33.5291	8.3755	8	0.0776091	1.35231e-13
2	116232750	116232800	0.00220719	69.2108	13.7176	8	0.152761	1.6827e-11
14	40715650	40715700	0.0016052	70.8581	13.615	7	0.113741	8.85814e-11
7	153895150	153895200	0.00172542	66.3546	13.8735	7	0.11449	1.04176e-10
6	50114550	50114600	0.00193769	44.6911	12.0126	7	0.0865976	2.42906e-11
11	103909800	103909850	0.00216732	62.1377	13.8546	7	0.134673	3.50751e-10
7	25199800	25199850	0.00192457	7.43804	1.5017	7	0.014315	5.2946e-17
9	84690850	84690900	0.00217256	21.8924	6.23347	6	0.0475626	4.3999e-11
12	25398250	25398300	0.00230305	7.13404	1.13748	5	0.01643	1.25544e-11
11	40172900	40172950	0.00144615	51.2857	12.5601	6	0.0741667	4.78789e-10
1	5536750	5536800	0.00202929	34.8024	11.7904	7	0.0706243	1.11196e-11
9	79782450	79782500	0.00235209	8.12691	2.5665	5	0.0191152	4.97846e-11
2	76960850	76960900	0.00206678	31.827	11.2046	6	0.0657794	4.7555e-10
1	145408100	145408150	0.00436998	8.12358	2.56571	6	0.0354999	9.51734e-12
13	67812600	67812650	0.00172734	27.3374	9.73791	7	0.047221	8.13556e-13
13	88810800	88810850	0.00185389	60.8269	12.2594	7	0.112766	8.9024e-11
5	116790550	116790600	0.0019523	25.6924	9.67166	7	0.0501591	1.50263e-12
2	155900700	155900750	0.00139966	51.886	12.6131	7	0.0726229	5.84564e-12
10	107167450	107167500	0.00213742	65.7623	12.0236	7	0.140562	3.56321e-10
16	26820550	26820600	0.00242	53.5516	12.6728	7	0.129595	2.98856e-10
7	153937300	153937350	0.00179809	80.4539	12.116	7	0.144663	3.57987e-10
11	48329500	48329550	0.00193846	16.1193	6.30906	8	0.0312467	5.2776e-16
10	82789450	82789500	0.00215185	42.5303	12.4452	7	0.091519	4.35666e-11
10	55792700	55792750	0.00212101	48.3812	12.1965	7	0.102617	6.80731e-11
8	43381650	43381700	0.00190614	39.4808	12.3234	8	0.0752561	2.11555e-13
7	86866350	86866400	0.00185187	12.0731	4.46026	9	0.0223579	1.45148e-19
13	23058000	23058050	0.00197104	26.5169	9.72806	6	0.0522659	1.35884e-10
3	78708700	78708750	0.00163541	20.8483	8.28406	8	0.0340955	1.13668e-15
7	68365700	68365750	0.00197566	65.579	12.0045	7	0.129562	2.04113e-10
2	76007800	76007850	0.00186199	25.2893	9.86186	6	0.0470885	8.68498e-11
1	176850300	176850350	0.00206505	37.8589	12.0904	6	0.0781804	1.04913e-09
9	103358050	103358100	0.001798	14.1201	5.51961	5	0.025388	2.99488e-10
12	41453650	41453700	0.00182567	52.3592	12.6378	8	0.0955906	6.41282e-13
8	111463500	111463550	0.00202757	64.7437	12.0814	8	0.131272	4.63391e-12
4	30091650	30091700	0.00185792	67.5621	11.8868	7	0.125525	1.56982e-10
8	140987650	140987700	0.00230394	9.98984	3.21931	5	0.023016	1.29386e-10
5	146568550	146568600	0.00194271	14.638	5.55554	6	0.0284374	4.01658e-12
11	98886750	98886800	0.00126351	45.5448	12.3035	9	0.0575461	1.59191e-16
7	108714050	108714100	0.00217466	69.5769	11.8355	7	0.151306	5.45058e-10
8	70576150	70576200	0.00202174	50.8288	12.3396	11	0.102762	4.41693e-18
4	21721850	21721900	0.00156442	31.7481	12.8371	6	0.0496674	1.32607e-10
8	114910600	114910650	0.00239419	63.4355	12.6406	7	0.151877	6.74515e-10
8	79086400	79086450	0.00205875	73.4426	12.9944	7	0.1512	5.65617e-10
2	16938600	16938650	0.00219734	29.4487	12.0653	6	0.0647088	6.58178e-10
5	84193700	84193750	0.00165831	49.358	12.8101	6	0.081851	9.35377e-10
8	116738600	116738650	0.00181972	60.8488	12.7578	7	0.110728	8.31597e-11
8	105800200	105800250	0.00154661	55.6903	12.1663	11	0.0861312	4.16749e-19
1	216589750	216589800	0.00186179	36.9019	13.8461	6	0.0687034	7.26121e-10
8	84119600	84119650	0.0023392	69.0293	12.8096	7	0.161473	9.36176e-10
2	225643300	225643350	0.00222785	22.6012	9.44621	11	0.050352	6.84922e-20
1	165562350	165562400	0.00239707	10.6812	4.57461	7	0.0256035	2.38112e-14
9	89473350	89473400	0.00189275	21.8031	9.22644	7	0.0412679	6.19538e-13
2	35504400	35504450	0.0025406	63.2899	12.5189	9	0.160794	5.82556e-13
11	14271050	14271100	0.00222638	9.16079	3.49823	5	0.0203954	9.61983e-11
19	28996000	28996050	0.00173957	74.8271	13.0733	7	0.130167	1.99909e-10
7	147079550	147079600	0.00238858	55.3122	12.0916	9	0.132118	1.31166e-13
21	31203950	31204000	0.00178857	22.5966	9.58739	8	0.0404156	6.14358e-15
5	3268650	3268700	0.00194608	56.221	12.2992	7	0.109411	8.18108e-11
6	118403850	118403900	0.00253174	60.7402	12.7483	7	0.153778	7.9024e-10
13	103883700	103883750	0.0018565	29.5075	12.1463	6	0.0547808	2.50025e-10
12	125667850	125667900	0.00238155	10.3141	4.41993	5	0.0245635	3.11973e-10
1	192415150	192415200	0.00238572	26.3492	10.9509	6	0.0628618	5.80069e-10
6	154079350	154079400	0.00224459	50.1397	12.6391	7	0.112543	1.283e-10
8	35940600	35940650	0.00232648	75.783	11.7961	9	0.176307	8.47567e-13
3	67886500	67886550	0.00278874	21.2466	10.0592	6	0.0592513	6.36828e-10
7	10431450	10431500	0.00217452	62.6483	11.4991	7	0.13623	2.8887e-10
2	23023900	23023950	0.00197345	70.3225	11.5823	8	0.138778	5.99126e-12
1	197349300	197349350	0.00193878	32.7169	10.7525	6	0.0634308	3.25527e-10
11	121870200	121870250	0.00182618	47.2773	10.8083	6	0.0863366	1.07045e-09
7	95546050	95546100	0.00263624	18.1717	9.15299	7	0.0479049	3.9264e-12
10	53327650	53327700	0.00222092	20.9622	10.0522	6	0.0465554	1.61141e-10
3	74182300	74182350	0.00169433	47.5929	10.815	6	0.0806383	7.09683e-10
5	165465950	165466000	0.00165797	80.3701	11.7953	7	0.133251	1.995e-10
3	159634250	159634300	0.00244549	9.48195	3.778	5	0.023188	1.98842e-10
3	137329900	137329950	0.00239306	28.7428	10.8658	6	0.0687835	7.46348e-10
4	161284000	161284050	0.00224675	60.4293	11.3022	7	0.135769	2.88668e-10
10	91924850	91924900	0.00233698	30.3628	10.8058	7	0.0709571	1.34959e-11
19	29524700	29524750	0.0021984	60.0984	11.2718	7	0.13212	2.40324e-10
6	73122100	73122150	0.0028827	35.2322	10.696	10	0.101564	7.23146e-16
10	67940650	67940700	0.00154062	25.5396	10.858	8	0.0393469	5.02388e-15
4	117022200	117022250	0.00220574	56.3503	10.9287	7	0.124294	1.64933e-10
8	91960700	91960750	0.00181618	25.0763	10.7119	7	0.0455431	1.27518e-12
2	49173750	49173800	0.00178662	29.3952	10.8472	14	0.0525181	4.53912e-26
3	115533800	115533850	0.00208761	21.3475	10.0711	8	0.0445652	2.43124e-14
8	64362400	64362450	0.00222682	70.7538	11.5109	11	0.157556	1.1761e-16
8	58187000	58187050	0.0022196	38.6862	10.6893	8	0.0858681	3.99077e-13
3	178936050	178936100	0.00213497	8.98108	3.40305	5	0.0191744	6.96776e-11
10	128491350	128491400	0.0014609	15.103	7.70811	6	0.0220641	2.45157e-12
16	59685200	59685250	0.00187499	57.3228	11.0173	8	0.10748	1.0097e-12
19	34269050	34269100	0.00288038	13.2855	6.52963	6	0.0382674	5.55073e-11
6	70011350	70011400	0.00201814	68.8196	11.7827	8	0.138887	6.34759e-12
2	2332300	2332350	0.00213316	88.5631	11.757	9	0.18892	1.27103e-12
6	62274000	62274050	0.00191904	67.5902	10.8459	7	0.129709	1.79066e-10
5	164057350	164057400	0.00222918	59.4041	10.569	7	0.132422	2.29444e-10
6	95367150	95367200	0.00153087	50.5042	10.3171	7	0.0773151	6.72475e-12
17	32053900	32053950	0.00181055	43.3393	10.4186	6	0.0784679	6.50913e-10
11	131932000	131932050	0.00205948	69.8716	10.9853	7	0.143899	3.58286e-10
13	83518850	83518900	0.00211404	74.0258	11.2253	7	0.156494	6.16953e-10
1	5570100	5570150	0.00162755	25.3875	8.60879	8	0.0413196	2.541e-15
14	59220550	59220600	0.00226031	8.8844	2.84686	5	0.0200815	6.50865e-11
1	215133800	215133850	0.00198836	26.2958	8.59492	6	0.0522855	1.02433e-10
10	50168200	50168250	0.0015364	37.9412	10.2175	6	0.058293	1.33352e-10
2	56376950	56377000	0.00214133	28.493	9.50444	7	0.061013	3.86084e-12
4	171059900	171059950	0.00297552	15.5838	5.79265	7	0.0463698	8.33357e-13
7	9693800	9693850	0.00170096	67.7162	10.8195	9	0.115182	2.04369e-14
8	76690050	76690100	0.00253466	69.0343	10.939	8	0.174979	3.50965e-11
7	137139100	137139150	0.0021046	54.7155	10.3493	11	0.115154	5.93193e-18
2	51886850	51886900	0.00154907	83.2855	11.7775	10	0.129015	7.14245e-16
5	18275200	18275250	0.00209607	52.1316	10.6695	9	0.109272	2.07362e-14
8	15905050	15905100	0.00161539	78.0732	11.551	7	0.126119	1.37591e-10
10	18285350	18285400	0.00188252	41.8783	10.447	6	0.0788367	7.05559e-10
4	165822200	165822250	0.00205263	17.0569	6.00159	7	0.0350115	9.80456e-14
8	20089400	20089450	0.00204952	12.9184	5.07911	5	0.0264765	3.73359e-10
20	43190850	43190900	0.00509781	0.737029	0.833424	4	0.00375724	3.19587e-10
12	25588550	25588600	0.00562906	0.972656	1.00715	4	0.00547514	1.00525e-09
10	59766700	59766750	0.00437884	1.63233	1.2691	4	0.00714769	1.06349e-09
5	85508750	85508800	0.00451832	3.38957	1.84079	5	0.0153151	5.7541e-11
2	15038500	15038550	0.00437614	1.48776	1.21595	4	0.00651066	8.59695e-10
16	79000400	79000450	0.00408218	1.46594	1.27662	4	0.00598424	7.59733e-10
17	59018050	59018100	0.00458821	0.993573	0.914171	4	0.00455872	3.11733e-10
8	123463750	123463800	0.00469004	1.41692	1.21836	4	0.00664541	1.10407e-09
5	1295200	1295250	0.00525208	7.20668	2.37391	10	0.03785	6.56861e-20
5	59096100	59096150	0.00508239	9.76828	3.10569	6	0.0496463	7.08451e-11
4	39449900	39449950	0.00464515	6.41823	1.59989	5	0.0298137	3.36101e-10
14	24895050	24895100	0.00471152	5.68493	1.21328	6	0.0267847	9.37359e-13
14	24895100	24895150	0.00474936	5.68493	1.21328	13	0.0269998	1.28436e-29
21	35916400	35916450	0.00489554	7.07541	2.24968	5	0.0346379	9.63953e-10
3	192162450	192162500	0.00631204	13.5174	4.14692	7	0.0853224	3.04897e-11
5	90079700	90079750	0.00573888	10.0752	3.19524	6	0.0578201	1.73877e-10
3	164903700	164903750	0.00494647	10.2802	3.25511	9	0.0508507	1.01946e-16
8	130694450	130694500	0.00460872	8.96165	2.87254	7	0.0413018	2.29542e-13
2	149546800	149546850	0.00471213	8.39749	1.62226	6	0.03957	8.64625e-12
9	35658000	35658050	0.00534862	5.44915	0.707674	5	0.0291454	2.01352e-10
2	49173750	49173800	0.00476883	12.633	3.45846	10	0.0602448	2.5266e-18
7	130516800	130516850	0.0047205	8.22184	1.54707	5	0.0388112	9.8895e-10
14	93587650	93587700	0.00443609	4.51662	0.587484	5	0.0200361	3.1187e-11
1	145020750	145020800	0.00464095	8.70574	1.75502	7	0.0404029	7.32053e-14
3	41266050	41266100	0.00498708	8.71642	1.7596	13	0.0434695	4.64706e-27
3	41266100	41266150	0.00486565	8.71642	1.7596	55	0.0424111	6.72029e-133
17	5335600	5335650	0.00480616	8.07455	1.48454	5	0.0388076	9.74639e-10
9	98665850	98665900	0.00488507	8.54007	1.68362	11	0.0417189	1.05149e-22
3	111499250	111499300	0.00481964	8.71853	1.76051	6	0.0420202	1.2935e-11
3	111499300	111499350	0.00486318	8.71853	1.76051	11	0.0423998	1.36134e-22
3	111499350	111499400	0.00490446	8.71853	1.76051	6	0.0427597	1.43506e-11
17	67482550	67482600	0.0046127	8.14719	1.51531	7	0.0375806	3.96934e-14
2	27184750	27184800	0.0053073	6.45558	0.869117	6	0.0342617	2.82916e-12
4	37641650	37641700	0.00520449	8.51819	1.6742	10	0.0443329	3.62908e-20
9	74654000	74654050	0.0047669	7.67185	1.57104	6	0.0365709	5.73927e-12
20	10151100	10151150	0.0046544	6.21961	1.14045	7	0.0289486	6.33706e-15
3	23509900	23509950	0.00441584	8.66765	2.05549	5	0.038275	1.10529e-09
2	178098950	178099000	0.0050913	8.96366	2.2004	6	0.0456367	2.69496e-11
3	101948050	101948100	0.00570049	9.73833	2.54603	7	0.0555132	1.05808e-12
7	25490250	25490300	0.00496715	8.28115	1.88587	7	0.0411337	1.00688e-13
5	90307000	90307050	0.00475959	7.32812	1.4396	6	0.0348789	4.14279e-12
8	38268300	38268350	0.00523063	6.38429	1.21189	5	0.0333939	4.71657e-10
10	7780100	7780150	0.00666421	10.6769	3.01381	9	0.0711531	1.24483e-15
6	49817450	49817500	0.00512118	11.1397	3.19102	7	0.0570484	1.58315e-12
10	89346150	89346200	0.00519345	7.07762	1.39019	6	0.0367573	5.66287e-12
3	188364500	188364550	0.00455779	8.34864	1.081	6	0.0380514	5.19399e-12
19	893450	893500	0.00509158	4.88704	0.22169	5	0.0248828	7.99151e-11
5	105724200	105724250	0.00735129	26.8672	5.15197	8	0.197508	1.17992e-10
5	105724350	105724400	0.00732681	26.8672	5.15197	12	0.196851	4.64087e-17
21	16350350	16350400	0.00474366	7.79773	0.806912	11	0.0369898	7.55409e-24
11	18103250	18103300	0.00472171	6.35485	0.455066	6	0.0300058	1.06766e-12
7	33972650	33972700	0.00527909	11.9953	2.21397	6	0.0633246	1.35827e-10
3	59561300	59561350	0.00548812	14.2101	3.06406	6	0.0779867	5.46621e-10
6	73122100	73122150	0.00563236	15.3689	3.47606	7	0.0865634	1.72321e-11
15	65105400	65105450	0.00470307	7.37404	1.51491	5	0.0346806	6.00711e-10
12	24690200	24690250	0.00471787	8.47816	2.08909	9	0.0399989	4.49605e-18
1	111003050	111003100	0.00480532	7.47092	1.56638	7	0.0359002	3.40948e-14
1	79086000	79086050	0.00428991	9.13383	2.35408	9	0.0391833	4.34815e-18
1	79086050	79086100	0.00471141	9.13383	2.35408	6	0.0430332	2.04654e-11
7	76949650	76949700	0.00541016	7.80502	1.7432	7	0.0422264	1.16802e-13
12	47213500	47213550	0.0047604	7.93282	1.81153	5	0.0377634	9.99054e-10
3	43746350	43746400	0.00509115	7.98214	1.83801	8	0.0406383	6.55563e-16
3	43746400	43746450	0.00475768	7.98214	1.83801	11	0.0379764	6.76537e-23
14	74239050	74239100	0.00492954	6.30241	0.926841	7	0.031068	8.2881e-15
1	173097200	173097250	0.00487128	8.30964	2.01571	7	0.0404786	1.01249e-13
17	7577100	7577150	0.00530231	7.09063	1.37366	5	0.0375967	8.61066e-10
17	7577500	7577550	0.00537629	7.09063	1.37366	8	0.0381213	2.77659e-16
17	7577550	7577600	0.00490625	7.09063	1.37366	10	0.0347884	3.12562e-21
17	7578200	7578250	0.0051184	7.09063	1.37366	14	0.0362927	1.43308e-30
17	7578400	7578450	0.00541016	7.09063	1.37366	7	0.0383614	4.82739e-14
17	7578450	7578500	0.00655632	7.09063	1.37366	6	0.0464884	2.26337e-11
14	91429000	91429050	0.00549785	7.27221	1.46522	6	0.0399815	9.59418e-12
